# Supplementary material for: One-year antibody persistence and safety of a 4-dose schedule of MenACWY-CRM in healthy infants from South Korea
Source: PubMed Central journal article supplement — Clin Exp Vaccine Res. 2019 Jul 31;8(2):94–102. doi: 10.7774/cevr.2019.8.2.94 (PMC6689500; doi:10.7774/cevr.2019.8.2.94), 2019-07-31
Supplement: cevr-8-94-s001.pdf [file cevr-8-94-s001.pdf]

## Supplemental Material

### Study inclusion/exclusion criteria

#### *Inclusion criteria*

Infants had to meet all the following criteria to be included in the study.

- Healthy male and female 2-month-old infants at time of consent
- Infants whose parents or legal guardians voluntary gave written informed consent after the nature of the study was explained according to local regulatory requirements, prior to study entry
- Infants whose parents or legal guardians would comply with study procedures including follow-up

#### *Exclusion criteria*

Infants meeting any of the following criteria were not included in the study.

- Previously received any meningococcal A, C, W, and Y vaccines
- Previous confirmed or suspected disease caused by *Neisseria meningitidis* or who have had household contact with and/or intimate exposure to an individual with laboratory confirmed *N. meningitidis* infection at any time since birth
- Progressive, unstable, or uncontrolled clinical conditions
- History of anaphylactic shock, asthma, urticarial, or other allergic reaction after previous vaccinations or known hypersensitivity to any vaccine component
- Experienced significant acute or chronic infection within 7 days before enrollment or had experienced fever (temperature  $\geq 38.0^{\circ}\text{C}$ ) within 3 days before enrollment
- Confirmed or suspected immunosuppressive or immunodeficient condition, based on medical history and physical examination
- Received treatment with systemic administration of corticosteroids for more than 14 consecutive days from birth
- Received blood, blood products and/or plasma derivatives or any parenteral immunoglobulin preparation at any time since birth
- Bleeding disorders considered as a contraindication to intra muscular injection or blood draw
- Any condition which, in the opinion of the investigator, might interfere with the results of the study or pose additional risk to the participant due to inclusion in the study
- Received or planned to receive any investigational or non-registered medicinal product from birth and throughout the study period
- Received oral or parenteral antibiotic treatment the 77 days prior to the scheduled blood draws (topical antibiotics were acceptable, including antibiotic eye drops)
- Were relatives of site research staff working on the study
