# Supplementary material for: One-year antibody persistence and safety of a 4-dose schedule of MenACWY-CRM in healthy infants from South Korea
Source: PubMed Central journal article supplement — Clin Exp Vaccine Res. 2019 Jul 31;8(2):94–102. doi: 10.7774/cevr.2019.8.2.94 (PMC6689500; doi:10.7774/cevr.2019.8.2.94), 2019-07-31
Supplement: cevr-8-94-s002.pdf [file cevr-8-94-s002.pdf]

**Supplementary Table 1.** Summary of hSBA immunogenicity results (hSBA full analysis set)

|             | No. | Participants with titers $\geq 8$ (95% CI, %) | GMT (95% CI)        | GMR <sup>a</sup> (95% CI) |
|-------------|-----|-----------------------------------------------|---------------------|---------------------------|
| <b>MenA</b> |     |                                               |                     |                           |
| 1M post-vac | 122 | 94 (88.5-97.7)                                | 107.9 (85.7-135.8)  | 0.061 (0.048-0.076)       |
| 1Y post-vac | 114 | 39 (30.4-49.1)                                | 6.8 (5.2-8.9)       |                           |
| <b>MenC</b> |     |                                               |                     |                           |
| 1M post-vac | 122 | 98 (94.2-99.8)                                | 201.0 (157.9-256.0) | 0.063 (0.049-0.080)       |
| 1Y post-vac | 110 | 61 (51.1-70.1)                                | 13.0 (9.7-17.6)     |                           |
| <b>MenW</b> |     |                                               |                     |                           |
| 1M post-vac | 122 | 100 (97.0-100.0)                              | 426.7 (338.3-538.2) | 0.12 (0.099-0.15)         |
| 1Y post-vac | 113 | 88 (80.1-93.1)                                | 53.6 (40.4-71.0)    |                           |
| <b>MenY</b> |     |                                               |                     |                           |
| 1M post-vac | 120 | 100 (97.0-100.0)                              | 359.4 (280.6-460.3) | 0.14 (0.11-0.16)          |
| 1Y post-vac | 114 | 89 (81.3-93.8)                                | 50.8 (38.8-66.5)    |                           |

hSBA, serum bactericidal assay using human complement; CI, confidence interval; GMT, geometric mean titer; GMR, geometric mean ratio; M, month; post-vac, post-vaccination with four MenACWY-CRM doses; Y, year.

<sup>a</sup>One-year vs. 1-month post-vaccination GMT ratio.
