# Supplementary material for: One-year antibody persistence and safety of a 4-dose schedule of MenACWY-CRM in healthy infants from South Korea
Source: PubMed Central journal article supplement — Clin Exp Vaccine Res. 2019 Jul 31;8(2):94–102. doi: 10.7774/cevr.2019.8.2.94 (PMC6689500; doi:10.7774/cevr.2019.8.2.94), 2019-07-31
Supplement: cevr-8-94-s003.pdf [file cevr-8-94-s003.pdf]

**Supplementary Table 2.** Summary of rSBA immunogenicity results (rSBA full analysis set)

|             | No. | Participants with titers (%) |                     | GMT (95% CI)                 | GMR <sup>a</sup> (95% CI) |
|-------------|-----|------------------------------|---------------------|------------------------------|---------------------------|
|             |     | ≥8 (95% CI)                  | ≥128 (95% CI)       |                              |                           |
| <b>MenA</b> |     |                              |                     |                              |                           |
| 1M post-vac | 115 | 100 (96.8 to 100.0)          | 100 (96.8 to 100.0) | 7,394.2 (6,057.4 to 9,025.9) | 0.32 (0.25 to 0.40)       |
| 1Y post-vac | 108 | 99 (94.9 to >99.9)           | 98 (93.5 to 99.8)   | 2,269.5 (1,761.1 to 2,924.6) |                           |
| <b>MenC</b> |     |                              |                     |                              |                           |
| 1M post-vac | 115 | 99 (95.3 to >99.9)           | 92 (85.7 to 96.4)   | 735.1 (545.2 to 991.0)       | 0.019 (0.013 to 0.027)    |
| 1Y post-vac | 108 | 54 (43.8 to 63.3)            | 30 (21.2 to 39.2)   | 17.2 (11.3 to 26.1)          |                           |
| <b>MenW</b> |     |                              |                     |                              |                           |
| 1M post-vac | 115 | 100 (96.8 to 100.0)          | 98 (93.9 to 99.8)   | 2,718.7 (2,031.8 to 3,637.9) | 0.039 (0.025 to 0.059)    |
| 1Y post-vac | 108 | 69 (59.8 to 77.9)            | 62 (52.2 to 71.2)   | 114.0 (65.2 to 199.4)        |                           |
| <b>MenY</b> |     |                              |                     |                              |                           |
| 1M post-vac | 116 | 100 (96.9 to 100.0)          | 98 (93.9 to 99.8)   | 2,226.7 (1,731.2 to 2,864.0) | 0.13 (0.096 to 0.18)      |
| 1Y post-vac | 107 | 90 (82.3 to 94.8)            | 80 (71.6 to 87.4)   | 310.9 (203.2 to 475.7)       |                           |

rSBA, serum bactericidal assay using rabbit serum; CI, confidence interval; GMT, geometric mean titer; GMR, geometric mean ratio; M, month; post-vac, post-vaccination with four MenACWY-CRM doses; Y, year.

<sup>a</sup>One-year vs. 1-month post-vaccination GMT ratio.
