# Supplementary material for: One-year antibody persistence and safety of a 4-dose schedule of MenACWY-CRM in healthy infants from South Korea
Source: PubMed Central journal article supplement — Clin Exp Vaccine Res. 2019 Jul 31;8(2):94–102. doi: 10.7774/cevr.2019.8.2.94 (PMC6689500; doi:10.7774/cevr.2019.8.2.94), 2019-07-31
Supplement: cevr-8-94-s004.pdf [file cevr-8-94-s004.pdf]

**Supplementary Table 3.** Summary of immunogenicity results for the per-protocol set

|             | hSBA |                              |                        | rSBA |                              |                     |                              |
|-------------|------|------------------------------|------------------------|------|------------------------------|---------------------|------------------------------|
|             | No.  | Participants with titers (%) | GMT (95% CI)           | No.  | Participants with titers (%) |                     | GMT (95% CI)                 |
|             |      | ≥8 (95% CI)                  |                        |      | ≥8 (95% CI)                  | ≥128 (95% CI)       |                              |
| <b>MenA</b> |      |                              |                        |      |                              |                     |                              |
| 1M post-vac | 97   | 95 (88.4 to 98.3)            | 123.7 (96.6 to 158.5)  | 91   | 100 (96.0 to 100.0)          | 100 (96.0 to 100.0) | 7,307.5 (5,800.1 to 9,206.7) |
| 1Y post-vac | 94   | 41 (31.4 to 52.1)            | 7.2 (5.3 to 9.6)       | 88   | 99 (93.8 to >99.9)           | 98 (92.0 to 99.7)   | 2,215.8 (1,644.4 to 2,985.9) |
| <b>MenC</b> |      |                              |                        |      |                              |                     |                              |
| 1M post-vac | 97   | 99 (94.4 to >99.9)           | 234.6 (181.3 to 303.4) | 91   | 100 (96.0 to 100.0)          | 95 (87.6 to 98.2)   | 866.0 (633.8 to 1,183.2)     |
| 1Y post-vac | 92   | 64 (53.5 to 73.9)            | 14.6 (10.5 to 20.3)    | 88   | 58 (47.0 to 68.4)            | 33 (23.3 to 43.8)   | 20.6 (12.9 to 32.8)          |
| <b>MenW</b> |      |                              |                        |      |                              |                     |                              |
| 1M post-vac | 97   | 100 (96.3 to 100.0)          | 459.9 (353.1 to 599.0) | 91   | 100 (96.0 to 100.0)          | 99 (94.0 to >99.9)  | 2,997.3 (2,159.2 to 4,160.6) |
| 1Y post-vac | 94   | 88 (80.0 to 94.0)            | 56.1 (41.5 to 75.9)    | 88   | 70 (59.8 to 79.7)            | 63 (51.5 to 72.6)   | 126.0 (67.7 to 234.4)        |
| <b>MenY</b> |      |                              |                        |      |                              |                     |                              |
| 1M post-vac | 96   | 100 (96.2 to 100.0)          | 374.7 (286.4 to 490.1) | 92   | 100 (96.1 to 100.0)          | 98 (92.4 to 99.7)   | 2,258.7 (1,697.0 to 3,006.5) |
| 1Y post-vac | 94   | 90 (82.6 to 95.5)            | 53.1 (39.7 to 71.0)    | 87   | 91 (82.7 to 95.9)            | 83 (73.2 to 90.0)   | 352.1 (220.3 to 562.6)       |

hSBA/rSBA, serum bactericidal assay using human/rabbit complement; CI, confidence interval; GMT, geometric mean titer; M, month; post-vac, post-vaccination with four MenACWY-CRM doses; Y, year.
