# Supplementary material for: One-year antibody persistence and safety of a 4-dose schedule of MenACWY-CRM in healthy infants from South Korea
Source: PubMed Central journal article supplement — Clin Exp Vaccine Res. 2019 Jul 31;8(2):94–102. doi: 10.7774/cevr.2019.8.2.94 (PMC6689500; doi:10.7774/cevr.2019.8.2.94), 2019-07-31
Supplement: cevr-8-94-s005.pdf [file cevr-8-94-s005.pdf]

**Supplementary Table 4.** Listing of serious adverse events from day 0 to study end, by system organ class and preferred term (overall safety set)

| Serious adverse event, by system organ class and preferred term           | Occurrence |
|---------------------------------------------------------------------------|------------|
| Congenital, familial and genetic disorders                                |            |
| Buried penis syndrome                                                     | 1          |
| Gastrointestinal disorders                                                |            |
| Enteritis                                                                 | 1          |
| Infections and infestations                                               |            |
| Bronchiolitis                                                             | 6          |
| Croup infectious                                                          | 1          |
| Gastroenteritis                                                           | 1          |
| Hand-foot-and-mouth disease                                               | 1          |
| Herpangina                                                                | 1          |
| Pharyngitis                                                               | 1          |
| Pharyngotonsillitis                                                       | 1          |
| Pneumonia                                                                 | 5          |
| Pneumonia influenzal                                                      | 1          |
| Pneumonia parainfluenzae viral                                            | 1          |
| Pneumonia respiratory syncytial viral                                     | 1          |
| Pneumonia viral                                                           | 1          |
| Tonsillitis                                                               | 2          |
| Upper respiratory tract infection                                         | 2          |
| Urinary tract infection                                                   | 3          |
| Viral infection                                                           | 1          |
| Injury, poisoning, and procedural complications                           |            |
| Contusion                                                                 | 1          |
| Ligament rupture                                                          | 1          |
| Tendon injury                                                             | 1          |
| Neoplasms benign, malignant, and unspecified (including cysts and polyps) |            |
| Cholesteatoma                                                             | 1          |
| Nervous system disorders                                                  |            |
| Seizure                                                                   | 1          |
