# Supplementary material for: One-year antibody persistence and safety of a 4-dose schedule of MenACWY-CRM in healthy infants from South Korea
Source: PubMed Central journal article supplement — Clin Exp Vaccine Res. 2019 Jul 31;8(2):94–102. doi: 10.7774/cevr.2019.8.2.94 (PMC6689500; doi:10.7774/cevr.2019.8.2.94), 2019-07-31
Supplement: cevr-8-94-s006.pdf [file cevr-8-94-s006.pdf]

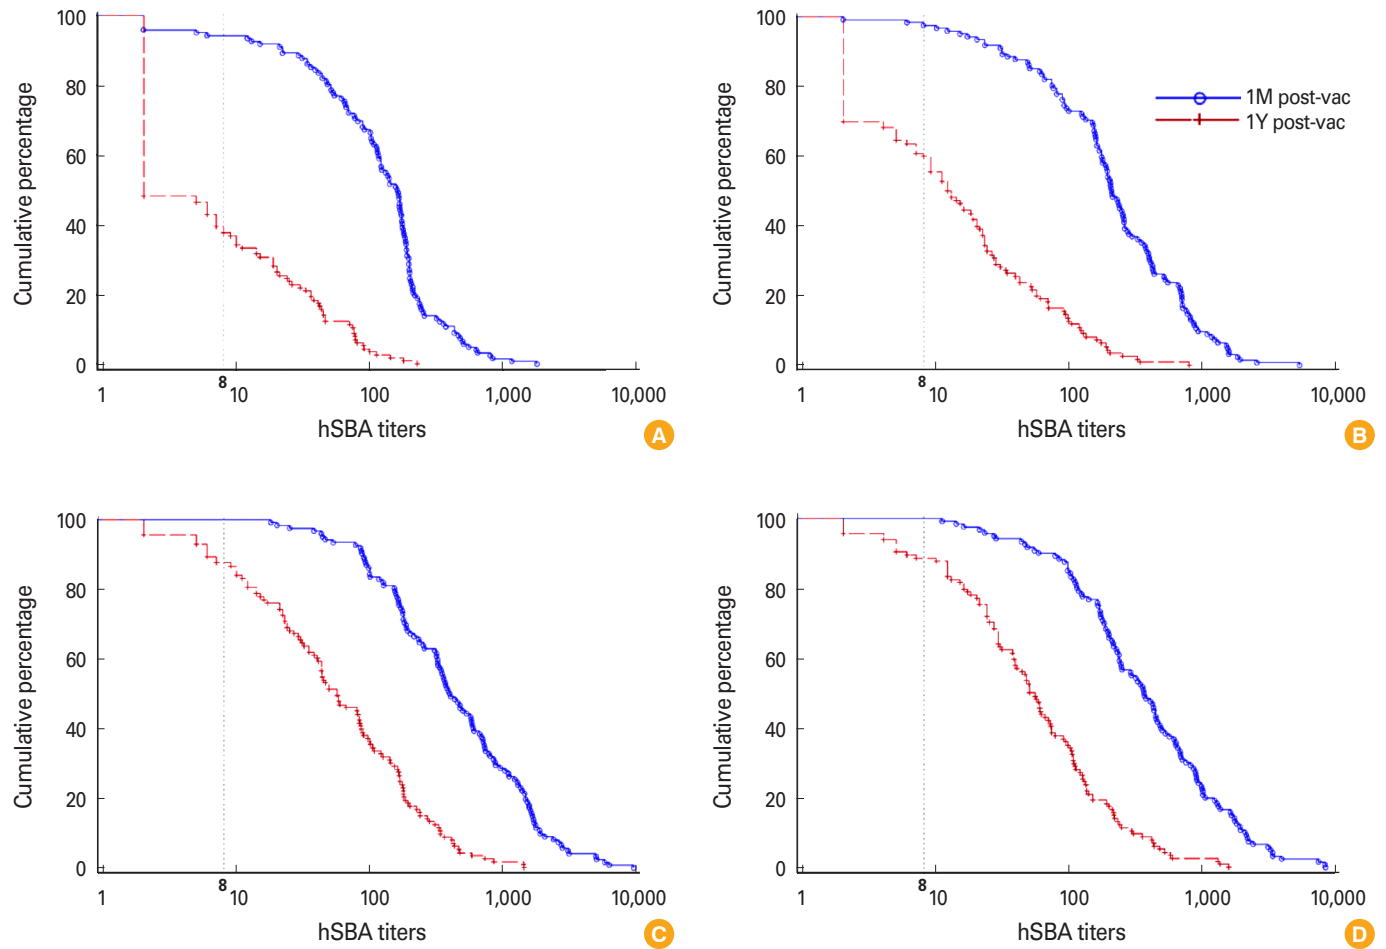

**Supplementary Fig. 1.** Reverse cumulative distributions of hSBA titers (full analysis set). (A) MenA. (B) MenC. (C) MenW. (D) MenY. hSBA, serum bactericidal assay using human complement; M, month; post-vac, post-vaccination with four MenACWY-CRM doses; Y, year.
